# Supplementary material for: Thermodynamic evidence for a dual transport mechanism in a POT peptide transporter
Source: eLife journal article supplement (doi:10.7554/elife.04273), 2014-12-02
Supplement: supp [file elife-04273-supp-v1.zip]

## Figure 2 - figure supplement 1

**A**  $nH_{out}^+ + mPep_{out} \rightleftharpoons nH_{in}^+ + mPep_{in}$

**B**  $\mu_{Hout} = \mu_H^\circ + RT \ln[H]_{out} + z_H F \Psi_{out}$

etc.

$$\Delta\mu_H = \mu_{Hin} - \mu_{Hout}$$

$$\Delta\mu_H = RT \ln \frac{[H]_{in}}{[H]_{out}} + z_H F \Delta\Psi$$

$$E_H = -\frac{RT}{z_H F} \ln \frac{[H]_{in}}{[H]_{out}}, z_H = +1$$

$$\Delta\mu_H = -FE_H + F\Delta\Psi$$

$$\Delta\mu_{pep} = RT \ln \frac{[Pep]_{in}}{[Pep]_{out}}$$

**C**  $\sum n_i \mu = 0$

$$n\mu_{Hin} + m\mu_{pepin} - n\mu_{Hout} - m\mu_{pepout} = 0 = n\Delta\mu_H + m\Delta\mu_{pep}$$

**D**  $0 = nRT \ln \frac{[H]_{in}}{[H]_{out}} + z_{H^+} nF \Delta\Psi + mRT \ln \frac{[Pep]_{in}}{[Pep]_{out}}$

$$-\frac{nF}{2.303RT} \Delta\Psi = n \log \frac{[H]_{in}}{[H]_{out}} + mRT \log \frac{[Pep]_{in}}{[Pep]_{out}}$$

$$\frac{2.303RT}{F} \approx 60mV, pH = -\log[H]$$

$$-\frac{n\Delta\Psi}{60mV} = n[-pH_{in} - (-pH_{out})] + m \log \frac{[Pep]_{in}}{[Pep]_{out}}$$

$$-\frac{n\Delta\Psi}{60mV} = n[pH_{out} - pH_{in}] + m \log \frac{[Pep]_{in}}{[Pep]_{out}}$$

$$\Delta\Psi = 60 \left\{ [pH_{in} - pH_{out}] - \frac{m}{n} \log \frac{[Pep]_{in}}{[Pep]_{out}} \right\}$$
