# Supplementary material for: Thermodynamic evidence for a dual transport mechanism in a POT peptide transporter
Source: eLife journal article supplement (doi:10.7554/elife.04273), 2014-12-02
Supplement: supp [file elife-04273-supp-v1.zip]

**Figure 3 – source data 1**

| <b>pH In</b> | <b>pH Out</b> | <b>n/m<br/>(stoichiometry,<br/>proton:peptide)</b> | <b>Peptide<br/>in (mM)</b> | <b>Peptide<br/>out (mM)</b> | <b>Delta<br/>psi*</b> |
|--------------|---------------|----------------------------------------------------|----------------------------|-----------------------------|-----------------------|
| 6.8          | 6.8           | 1                                                  | 10                         | 0.1                         | -120                  |
| 6.8          | 6.8           | 2                                                  | 10                         | 0.1                         | -60                   |
| 6.8          | 6.8           | 3                                                  | 10                         | 0.1                         | -40                   |
| 6.8          | 6.8           | 4                                                  | 10                         | 0.1                         | -30                   |
| 6.8          | 6.8           | 5                                                  | 10                         | 0.1                         | -24                   |
| 6.8          | 6.8           | 6                                                  | 10                         | 0.1                         | -20                   |
| 6.8          | 6.0           | 1                                                  | 10                         | 0.1                         | -72                   |
| 6.8          | 6.0           | 2                                                  | 10                         | 0.1                         | -12                   |
| 6.8          | 6.0           | 3                                                  | 10                         | 0.1                         | 8                     |
| 6.8          | 6.0           | 4                                                  | 10                         | 0.1                         | 18                    |
| 6.8          | 6.0           | 5                                                  | 10                         | 0.1                         | 24                    |
| 6.8          | 6.0           | 6                                                  | 10                         | 0.1                         | 28                    |
