# Supplementary figures and images for: Thermodynamic evidence for a dual transport mechanism in a POT peptide transporter
Source: eLife journal article supplement (doi:10.7554/elife.04273), 2014-12-02

Figure 1 - figure supplement 2

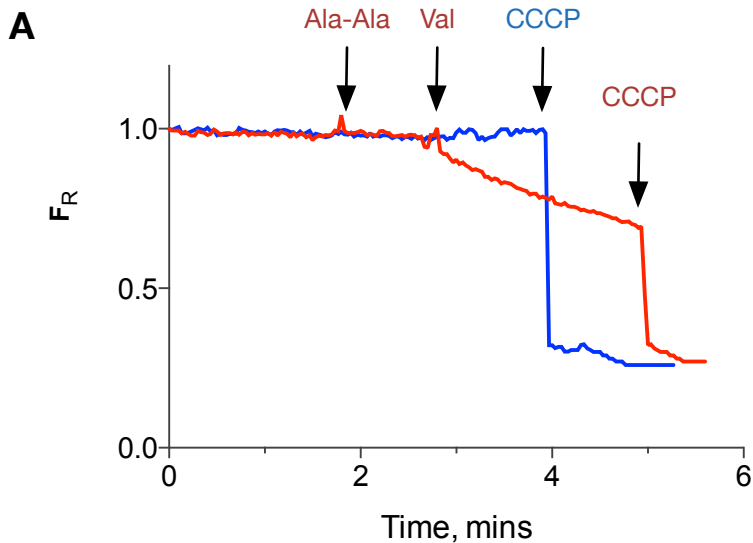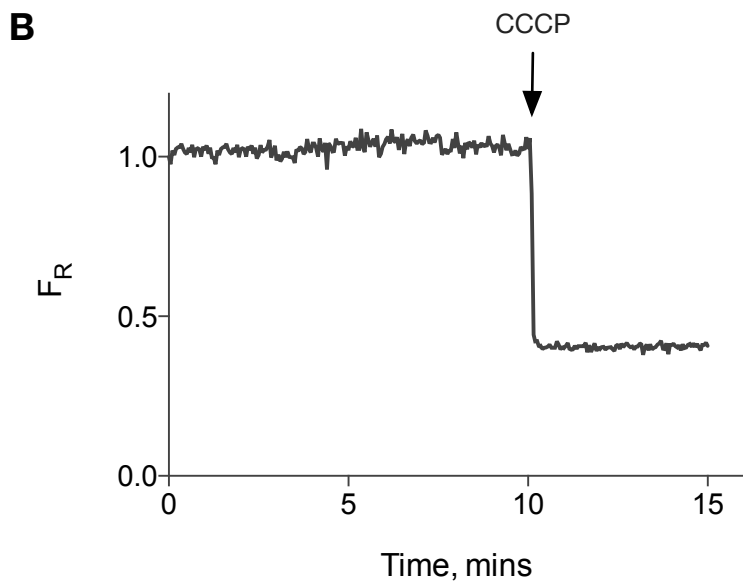

Supplement: supp [file elife-04273-supp-v1.zip]

**Figure 6 - figure supplement 1**

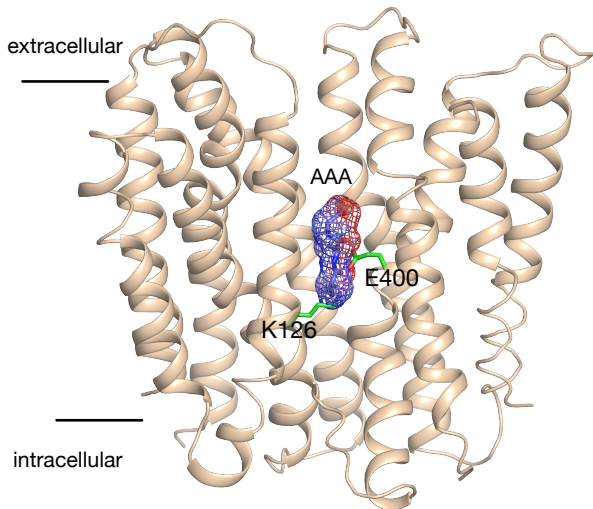

Supplement: supp [file elife-04273-supp-v1.zip]

**Figure 1 - figure supplement 3**

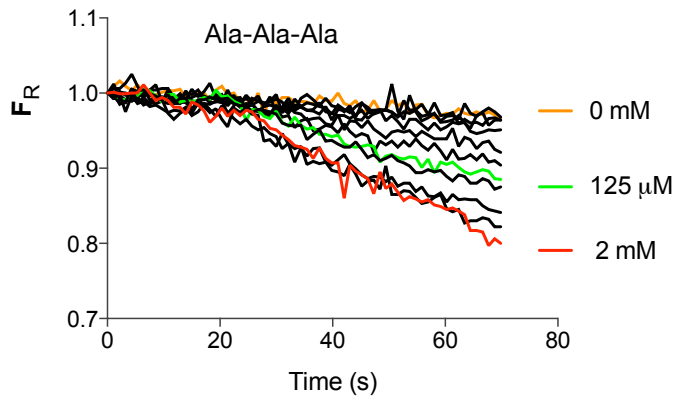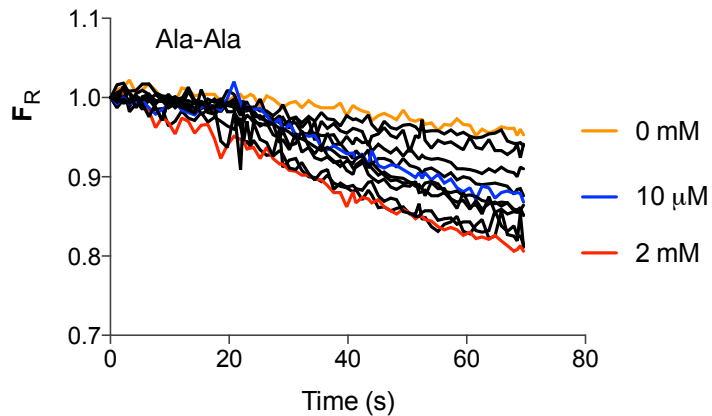

Supplement: supp [file elife-04273-supp-v1.zip]

**Figure 1 - figure supplement 1**

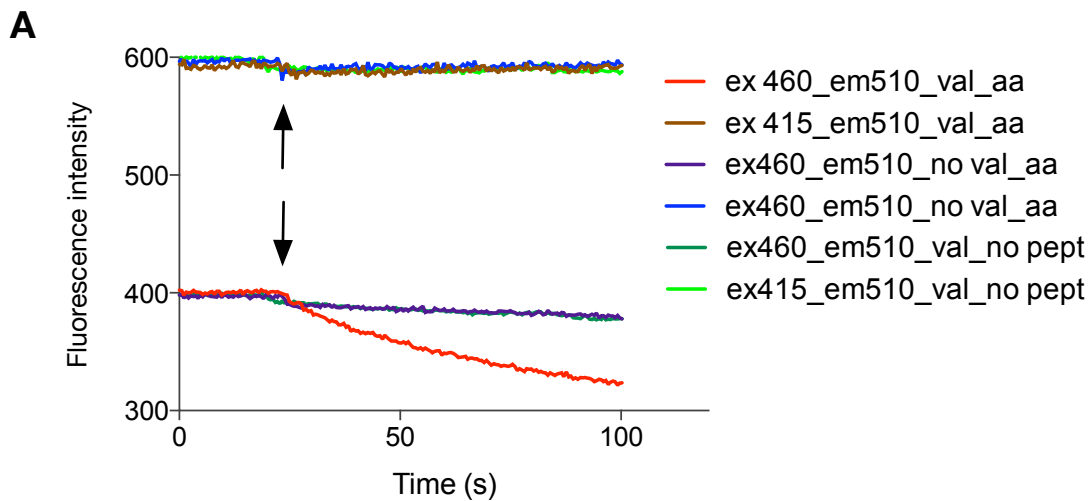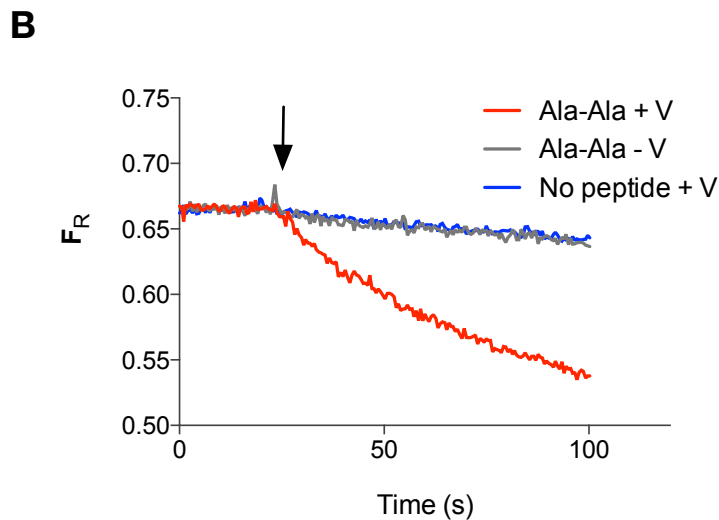

Supplement: supp [file elife-04273-supp-v1.zip]
